# Supplementary material for: Deciphering electrochemical interactions in metal–polymer catalysts for CO2 reduction
Source: Royal Society of Chemistry journal article supplement (doi:10.1039/d3ee01647a), 2023-01-01
Supplement: d3ee01647a1.pdf [file d3ee01647a1.pdf]

1           **Supporting Information of “Deciphering electrochemical**  
2           **interactions in metal-polymer catalysts for CO<sub>2</sub> reduction”**

3

4 Xingyu Wang<sup>1</sup>, Sanjubala Sahoo<sup>2,3</sup>, Jose Gascon<sup>4</sup>, Mikhail Bragin<sup>5</sup>, Fangyuan Liu<sup>2</sup>, Julia

5 Olchowski<sup>1</sup>, Samuel Rothfarb<sup>1</sup>, Yuankai Huang<sup>1</sup>, Wenjun Xiang<sup>1</sup>, Pu-Xian Gao<sup>2,3</sup>, S. Pamir

6 Alpay<sup>2,3</sup>, Baikun Li<sup>1\*</sup>

7

8 <sup>1</sup>Department of Civil and Environmental Engineering, University of Connecticut, Storrs,

9 Connecticut 06269-3037, USA

10 <sup>2</sup>Institute of Materials Science, University of Connecticut, Storrs, Connecticut 06269-3136, USA

11 <sup>3</sup>Department of Materials Science and Engineering, University of Connecticut, Storrs,

12 Connecticut 06269-3136, USA

13 <sup>4</sup>Department of Chemistry, University of Connecticut, Storrs, Connecticut 06269-3037, USA

14 <sup>5</sup>Department of Electrical and Computer Engineering, University of Connecticut, Storrs,

15 Connecticut 06269-3037, USA

16

17

18

19

## 20 Theory S1. Theory of Multiscale Model

### 21 S1.1 Transport and distribution model (system level).

22 The system level implements the transport of molecules in the catholyte and the cathode surface.

23 To well correspond with our experimental evaluation, the catholyte is set to be 0.1M of  $KHCO_3$

24 solution in the multiscale model development, and all the molecular distribution and pH (6.8 with

25 saturated  $CO_2$ ) are assumed to be even and homogenous in the bulk phase under the mixing effect

26 due to the continuous sparging of  $CO_2$ , meaning that the only diffusion resistance comes from the

27 heterogenous cathode-bulk boundary layer ( $10 \mu m$ ). As the concentration of catholyte is considered

28 dilute, Poisson-Nernst-Planck (PNP) equation achieved by coupling Nernst-Planck equation (Eq.1)

29 and Poisson equation (Eq.2) together, is used for the profiling of bulk solution mass

30 conservations<sup>1</sup>:

$$31 \quad \frac{\partial c_i}{\partial t} = \nabla \cdot D_i \left( \nabla c_i + \frac{z_i c_i \nabla \phi}{k_B T} \right) \quad (\text{Eq.1})$$

$$32 \quad -\nabla(\epsilon_w \epsilon_0 \nabla \phi) - \lambda \sum_i z_i c_i = Q \quad (\text{Eq.2})$$

33 In which  $c_i$  and  $z_i$  are the concentration and charge of molecules in the solution. Here we consider

34 the existence of  $CO_2$ ,  $H^+$ ,  $OH^-$ ,  $K^+/Na^+$ ,  $HCO_3^-$ , and  $CO_3^{2-}$  in the electrolyte. The boundary

35 conditions for  $c_i$  and  $z_i$  in Nernst-Planck equation and Poisson Equation have been defined in Table

36 S7.  $D_i$  represents diffusion coefficients of molecules, which can be found in Table S8.  $k_B$  and T are

37 Boltzmann constant and temperature ( $20^\circ C$  or 293K), respectively.  $\phi$  is the electrostatic potential.

38  $\epsilon_w$  and  $\epsilon_0$  represent the dielectric permittivity water and vacuum. Q is the permanent charge density,

39 which is calculated through Eq.3<sup>2</sup>:

$$40 \quad Q(x) = \sum_i z_i \delta(x - x_i) \quad (\text{Eq.3})$$

41 Where  $x$  represents the position/distance from the cathode surface and the  $\delta$  is the  $\delta$ -function for  
 42 discrete charge calculation. The existence of homogenous buffer reaction (CO<sub>2</sub> hydration and acid-  
 43 base equilibrium) due to the coexistence of CO<sub>2</sub>, H<sup>+</sup>, OH<sup>-</sup>, HCO<sub>3</sub><sup>-</sup>, and CO<sub>3</sub><sup>2-</sup> associated pH with the  
 44 concentration of CO<sub>2</sub>, where the correlation has been summarized below (in the form of H<sup>+</sup>  
 45 association/dissociation):

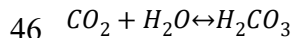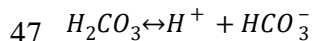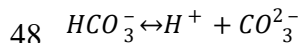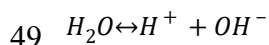

50 For the solution close to the cathode surface, as there is no obvious concentration divergence  
 51 beyond 5nm from the cathode surface, we determine that the Helmholtz layer of the continuum  
 52 model mainly exists in this region (Figure 1). The aggregation effect of cations leads to a different  
 53 transport phenomenon compared to the diluted bulk solution. Because the PNP equation might fail  
 54 within the CO<sub>2</sub>RR onset range in our study (absolute value:  $\sim 0.4V - 1.5V$  vs RHE), which is above

55 the thermal potential ( $\frac{k_B T}{e} = 25mV$ )<sup>3</sup>, Stefan-Maxwell equation is applied (Eq.4) in the hydraulic  
 56 boundary near the cathode surface<sup>4</sup>:

57 
$$\nabla \ln a_i = \sum_j \frac{c_j}{c} D_{ij} \left( \frac{J_j}{c_j} - \frac{J_i}{c_i} \right) \quad (\text{Eq.4})$$

58 Where  $a_i$  and  $J_i$  is the activity and flux of molecules.  $c$  is the total molar concentration.  $D_{ij}$  is Stefan-  
 59 Maxwell diffusion coefficient, which is calculated through Darken equation (Eq.5)<sup>5</sup>:

60 
$$D_{ij} = c_i D_j + c_j D_i \quad (\text{Eq.5})$$

61 In the Helmholtz layer area, CO<sub>2</sub> tends to be absorbed onto the cathode surface, where the  
 62 adsorption energy can be described through thermodynamic model (Eq.6)<sup>6</sup>:

$$\Delta G_{CO_2} = -RT \ln \left[ \frac{K_L}{\gamma} \right] \quad (\text{Eq.6})$$

where  $K_L, \gamma$  are Langmuir equilibrium constant and activity coefficient.

### S1.2 Electrochemistry model (molecular level).

The molecular level of electrochemistry describes the reduction kinetics and losses contributed by the mass transport and charge transfer. As the kinetics of the cathode is described through microkinetic models, for the anode surface, only oxygen evolution reaction (OER) is expected to happen, which can be described by Tafel kinetics (Eq.7)<sup>7</sup>:

$$j_a = j_{0a} \cdot e^{\frac{2\alpha_a F \eta}{RT}} \quad (\text{Eq.7})$$

Where the  $j_0$  and  $\alpha$  was set to be  $4.684 \times 10^{-9} \text{ mA/cm}^2$  and 0.5 respectively<sup>8</sup>.

The cathodic kinetics is determined through microkinetic model. The reaction rates of elementary steps in the Mechanism I and Mechanism II are calculated through the power-law of rate equation separately (Theory S2), where the rate constant is determined through transition state theory (Eq.8)<sup>9</sup>:

$$k_i = \frac{k_B T}{h} c_i \cdot e^{\left( -\frac{\Delta G}{k_B T} \right)} \quad (\text{Eq.8})$$

In which  $k_i$  is the rate constant and  $h$  is the Planck number.  $\Delta G$  represents the activation free energy for the  $i$ th reaction, which is calculated through the quantum chemistry model (the atomistic level) using VASP.  $c_i$  here represents the concentration in the Helmholtz layer near the cathode surface, which is different from bulk concentration and is determined in the transport and distribution model (the system level). In the microkinetic model, the power rate law associated with transition state theory shifts from quasi-monomolecular surface adsorption kinetics for Eley-Rideal (ER)

83 mechanism (Eq.9) towards bimolecular surface adsorption kinetics for Langmuir-Hinshelwood  
 84 (LH) mechanism (Eq.10):

$$85 \quad r = k_1 c_{*CO_2} \theta_{*H^+} \quad (\text{Eq. 9})$$

$$86 \quad r = k_2 \theta_{*CO_2} \theta_{*H^+} \quad (\text{Eq. 10})$$

87 where k is the rate constant calculated from transition state theory,  $\theta_{*CO_2}$  and  $\theta_{*H^+}$  represents the  
 88 adsorbed CO<sub>2</sub> and H<sup>+</sup> on the cathode surface, and  $c_{CO_2}^c$  is the H<sup>+</sup> concentration in Helmholtz layer.

89 The major difference of ER (Eq.9) and LH (Eq.10) is reflected on the CO<sub>2</sub> representation from  
 90 unadsorbed form ( $c_{*CO_2}^c$ ) to adsorbed form ( $\theta_{*CO_2}$ ), as well as the change of kinetic constant k.

91 The effect of Cu-Cation-CO<sub>2</sub> triple binder electron bridge is considered by introducing a cation  
 92 coverage factor  $\theta_{*Cation}$  to explicate the change of reaction rate.  $\theta_{*Cation}$  is set to be consistent with  
 93 the cation-Cu ratio in VASP calculation.

94 With the cathodic current density acquired experimentally, the incorporation of experimental  
 95 current density into the molecular level delivers quantitative coefficients of thermodynamic charge  
 96 transfer during CO<sub>2</sub>RR. Therefore, we can deduce the charge transfer coefficient on cathode as  
 97 Eq.11:

$$98 \quad \alpha_c = -\frac{RT}{zF\eta} \log(j_e - j_a) \quad (\text{Eq.11})$$

99 Where  $j_e$  is the cathodic exchange current density and can be acquired using the microkinetic  
 100 model (Eq.12)<sup>9</sup>:

$$101 \quad j_e = Fk_i(c_{ox}^{1-\beta} c_{re}^\beta) \quad (\text{Eq.12})$$

102 Where  $c_{ox}$  and  $c_{re}$  represents the redox pair in each elementary step described in Theory S2.  $\beta$  is  
 103 the symmetry factor, which can be assumed with free energy barrier ( $\Delta G^*$ ) and the reaction free  
 104 energy ( $\Delta G$ ) from Vienna ab initio Simulation Package (VASP) (Eq.13)<sup>10</sup>:

105 
$$\beta = \frac{\Delta G^*}{\Delta G} \quad (\text{Eq.13})$$

106 At the heterogenous interface of cathode and catholyte, impedances always exist due to the  
 107 mass/charge transfer. Moreover, the separation of charges caused by the alternation of the ion  
 108 distribution in the Helmholtz layer also contributes to the impedance. The charge distribution on  
 109 the cathode surface on the electrode side represents the charge contributed by the applied potential  
 110 (Eq.14)<sup>11</sup>:

111 
$$\rho_{surf} = \frac{\epsilon_w \epsilon_0 \phi}{xS} \quad (\text{Eq.14})$$

112 The xS represents the distance of the inner Helmholtz layer. The cumulation of ions on the solution  
 113 side near cathode surface boosts ionic charge density (Eq.15)<sup>12</sup>:

114 
$$\rho_{ion} = \sum_i n_i z_i e_0 \cdot e^{\left(\frac{z_i F \phi}{RT}\right)} \quad (\text{Eq.15})$$

115  $n_i$  is the molar quantity of the molecule and  $e_0$  is the elementary charge ( $1.602 \times 10^{-19} C$ ). The  
 116 separation of charge results in a barrier for the mass and charge transport, which is quantified  
 117 through mass transport loss (Eq.16) and ohmic resistance (Eq.17), respectively<sup>13,14</sup>:

118 
$$\eta_{mass} = \frac{RT}{zF} \cdot \ln \frac{j_L}{j_L - j} \quad (\text{Eq.16})$$

119 
$$R_{electrode} + R_{electrolyte} = \frac{\phi}{j} \quad (\text{Eq.17})$$

120  $j_L$  is the maximum current density where all the CO<sub>2</sub> molecules are consumed. Here we assume  
 121 this number to be 10 mA/cm<sup>2</sup> from the average value of current density tests. The pristine Cu  
 122 electrode resistance  $R_{electrode}$  is determined through the EIS test to be 10.4 Ω/cm<sup>2</sup>.

123 At the initiation stage of the reaction, the partial voltage to overcome the activation energy of the  
 124 reduction reaction can be quantified through the activation loss (Eq.18)<sup>15</sup>:

125 
$$\eta_{act} = \frac{RT}{\alpha_c F} \ln \frac{j}{j_e} \quad (\text{Eq.18})$$

126 Moreover, the continuous consumption of CO<sub>2</sub> and H<sup>+</sup> contributes to a reversible drop of cathodic  
 127 potential, which can be quantified as Nernstian loss (Eq.19)<sup>16</sup>:

128 
$$\eta_{Nernstian} = \frac{RT}{F} \ln \left( \frac{c_{H^+ - bulk}}{c_{H^+ - cathode}} \right) + \frac{RT}{zF} \ln \left( \frac{c_{CO_2 - bulk}}{c_{CO_2 - cathode}} \right) \quad (\text{Eq.19})$$

129 The correlations of the major equations above were ascribed in [Figure S25](#).

### 130 S1.3 Quantum chemistry (the atomistic level).

131 The simulation of the atomistic level is delivered through the density functional theory (DFT)  
 132 using Vienna ab initio Simulation Package (VASP). First-principles based studies are performed  
 133 within generalized gradient approximation (GGA) parameterized by Perdew-Burke-Ernzerhof  
 134 (PBE) for the exchange and correlation functional<sup>17</sup>. As a catalyst system, the Cu surface is  
 135 considered to investigate the CO<sub>2</sub> reduction mechanism. The (111) surface of Cu is considered due  
 136 to its high stability compared to other Cu surfaces<sup>18</sup>. The surface is constructed from the bulk FCC  
 137 crystal structure with equilibrium lattice parameters  $a = 3.64 \text{ \AA}$  which is in good agreement with  
 138 experimental values (3.61  $\text{\AA}$ ). The surface consists of (3×4) supercells of bulk FCC Cu lattice.  
 139 Periodic boundary conditions are applied along the surface plane with a simulation box (13.37 ×  
 140 10.29 × 22.31)  $\text{\AA}^3$  where a 16  $\text{\AA}$  vacuum is kept along the z-direction. The top two layers of the  
 141 Cu(111) surface are allowed to relax while the rest atoms are fixed to constrain to bulk bond  
 142 lengths.

143 The adsorption energy (E<sub>ads</sub>) of the molecules on Cu(111) is calculated as

144 
$$E_{ads} (eV) = E[\text{molecule@Cu}(111)] - E[\text{Cu}(111)] - E(\text{molecule}) \quad (\text{Eq.20})$$

145 where, the first, second, and third terms on the right hand side represent the total energies of  
146 molecule@Cu(111) complex, the Cu(111) support, and the various single molecules, respectively.  
147 The reaction pathway for the CO<sub>2</sub> reduction mechanisms is studied using the constrained energy  
148 minimization method, where a series of images are created between the reactant and the product  
149 to investigate the reaction pathway.

150 The effect of PTFE is demonstrated where a monomer (TFE) of PTFE is introduced in the vicinity  
151 of the co-adsorbed reactant (CO<sub>2</sub>) and reaction intermediates such as COOH, HCOO, CH<sub>2</sub>O, CHO  
152 and CH<sub>4</sub>. The adsorption energy of the respective molecules with PTFE is defined as;

$$153 E_{ads} (eV) = E[molecule@Cu(111)@TFE] - E[Cu(111)@TFE] - E(molecule) \quad (Eq.21)$$

154 where, the first, second and the third terms indicate the total energies of the Cu+TFE+molecule  
155 complex, polymer-Cu complex and the molecules (e.g., CO<sub>2</sub>, COOH, HCOO, CH<sub>2</sub>O, CHO and  
156 CH<sub>4</sub>), respectively.

157 One of the key quantities that drives the reaction kinetics is the energy barrier (EB) which is  
158 defined as the total energy difference between the transition state geometry and the reactant.

$$159 EB = E_{TS} - E_{Reactant} \quad (Eq.22)$$

160 where the E<sub>TS</sub> and E<sub>Reactant</sub> are the total energies of the transition state structure and the reactant,  
161 respectively.

162 The orbital-projected spin-polarized density of states (DOS) is calculated using Gaussian smearing  
163 with a broadening parameter value 0.05 eV. A cut-off energy of 300 eV is used for clean Cu(111)  
164 while for the adsorbed the adsorbed systems, a value of 400 eV is used. Using different energy  
165 cut-off energy values for the plane wave expansion of wave function does not change the DOS  
166 significantly. The Fermi level remains the same. A same k-mesh (3×3×1) and same exchange-



167 correlation functionals (GGA-PBE) for the geometry optimization are used for the DOS  
168 calculations.

169 All computations are carried out using the Vienna *ab initio* Simulation Package (VASP) with the  
170 plane wave basis set<sup>19</sup>. The projector-augmented wave method is used for the electron-core  
171 interactions<sup>20</sup>. The energy cut-off for the plane waves is taken as 400 eV. The Brillouin zone  
172 integrations are done with (3×3×1) k-points mesh. The total energy convergence criteria for  
173 geometry optimization are fixed to 10<sup>-6</sup> eV. The partial charge analysis on each atomic species is  
174 done by using the Bader charge method<sup>21</sup>.

175 For the free energy change profiles of proton-electron coupled reduction process, as well as the  
176 activation energy used in transition state theory, the computational hydrogen electrode (CHE) is  
177 implemented in this study (Eq.23)<sup>22</sup>:

$$178 \quad \Delta G = E(\text{Product}) - E(\text{Reactant}) - \left[ \frac{1}{2}E(\text{H}_2) - eU - 0.059 \times \text{pH} \right] \quad (\text{Eq.23})$$

179 Where  $\mu$  represents free energy of reactants/intermediates/products. All those energies have been  
180 calculated from VASP as described above. The pH is selected to be 6.8, which is consistent with  
181 our experimental setups.

#### 182 **S1.4 Adjustment of model parameter with existence of polytetrafluoroethylene (PTFE).**

183 The adjustment of surface affinity and polarity is executed by modifying the Cu catalyst with  
184 polytetrafluoroethylene (PTFE) that renders binding property of the electrode and carries spatial  
185 affinity towards non-charged CO<sub>2</sub><sup>23,24</sup>. Consistently, in the multi-scale model settings, PTFE with  
186 exceptionally low dipole moment possesses a relative permittivity ( $\epsilon$ ) of 2.1 due to the low electric  
187 polarizability of fluorine compared to water of 80. Given the paltry wettability of PTFE in the  
188 water phase, here we assume there is only one layer of water molecules in the inner Helmholtz  
189 Layer and the polarity and surface capacitance of the PTFE-Cu cathode is around 40 times lower

190 than the pristine Cu cathode. In addition, the SEM imaging and EDAX composition analysis  
191 indicate that the surface coverage of Cu alters with different ratios of PTFE additives. With a thin  
192 layer of the PTFE-Cu mixture catalyst ( $<10 \mu\text{m}$ , [Figure 2b](#)) casted directly on the surface of carbon  
193 cathode, the diffusion of species is only considered in one dimension ([Figure 1b](#)). At such a short  
194 distance, the difference between the diffusions across PTFE and Cu is trivial, and thus we ignore  
195 the possible path in the PTFE structure and assume that PTFE-Cu cathode has the same surface,  
196 and the diffusion coefficients ([Table S8](#)) are shared for the species diffusion in both Cu and PTFE.  
197  
198

199 **Theory S2. Elementary steps of CO<sub>2</sub>RR according to numbers of electron transfer.**

200 Cathode (CO<sub>2</sub>RR-CO Generation):

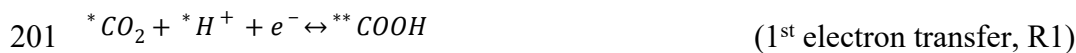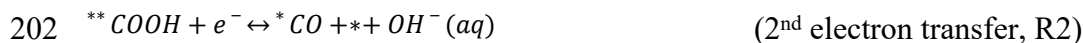

203 Cathode (CO<sub>2</sub>RR-CH<sub>4</sub> Generation Mechanism I):

204 *Note: first step from CO<sub>2</sub> to CO was same as above*

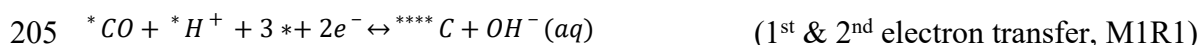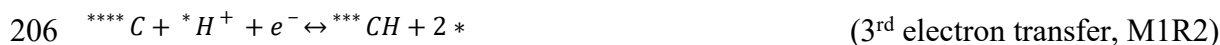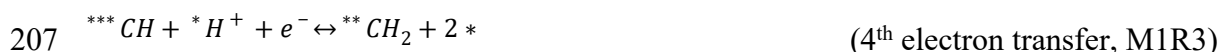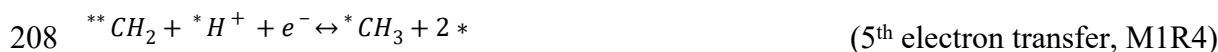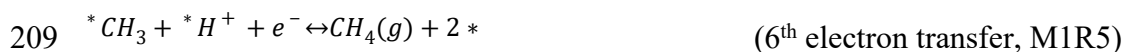

210 Cathode (CO<sub>2</sub>RR-CH<sub>4</sub> Generation Mechanism II):

211 *Note: first step from CO<sub>2</sub> to CO was same as above*

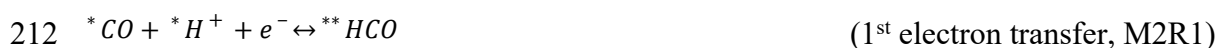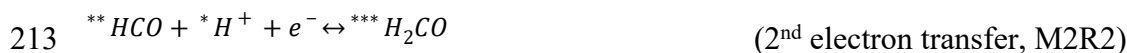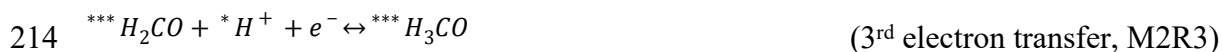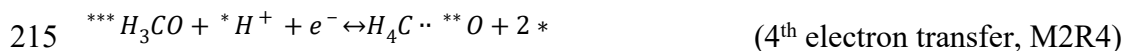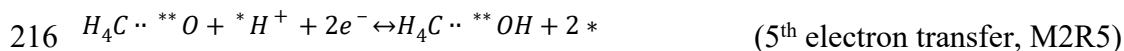

217

218

|                                                                      | <br>Structure-Process-Principle Multiscale Paradigm | <br>Quantum/Molecular Dynamics Simulation | <br>Macro Continuum Simulation | <br>Structure-Principle Limited Multiscale |
|----------------------------------------------------------------------|--------------------------------------------------------------------------------------------------------------------------------------|----------------------------------------------------------------------------------------------------------------------------|-------------------------------------------------------------------------------------------------------------------|-------------------------------------------------------------------------------------------------------------------------------|
| Transport & Distribution of Molecules & Ions (1 <sup>st</sup> Level) | ✓                                                                                                                                    | ✗                                                                                                                          | ✓                                                                                                                 | ✓                                                                                                                             |
| Electrochemical Kinetics of Reaction (2 <sup>nd</sup> Level)         | ✓                                                                                                                                    | ✗                                                                                                                          | ✓                                                                                                                 | ✓                                                                                                                             |
| Surface Process Identification (2 <sup>nd</sup> Level)               | ✓                                                                                                                                    | ✗                                                                                                                          | ✗                                                                                                                 | ✗                                                                                                                             |
| Model-Experiment Integration (2 <sup>nd</sup> Level)                 | ✓                                                                                                                                    | ✗                                                                                                                          | ✗                                                                                                                 | ✗                                                                                                                             |
| Quantum Mechanical Molecular Structure (3 <sup>rd</sup> Level)       | ✓                                                                                                                                    | ✓                                                                                                                          | ✗                                                                                                                 | ✓                                                                                                                             |
| Free Energy & Barrier Energy Profile (3 <sup>rd</sup> Level)         | ✓                                                                                                                                    | ✓                                                                                                                          | ✗                                                                                                                 | ✓                                                                                                                             |

219

220 **Figure S1.** Comparison of the multiscale model in this study with other methods<sup>3,25-31</sup>.

221 Compared to previously reported multiscale studies, our method outperforms conventional  
 222 models that are based solely on molecular structures and enabled discovery of the deterministic  
 223 role of the surface reaction processes. Our molecular level functions as a bridge connecting the  
 224 continuum model (system level) and quantum/atomistic model (atomistic level) using an  
 225 electrochemical spectrum model. Verifying the multiscale model through experiments further  
 226 improves the integrity of our study.

227

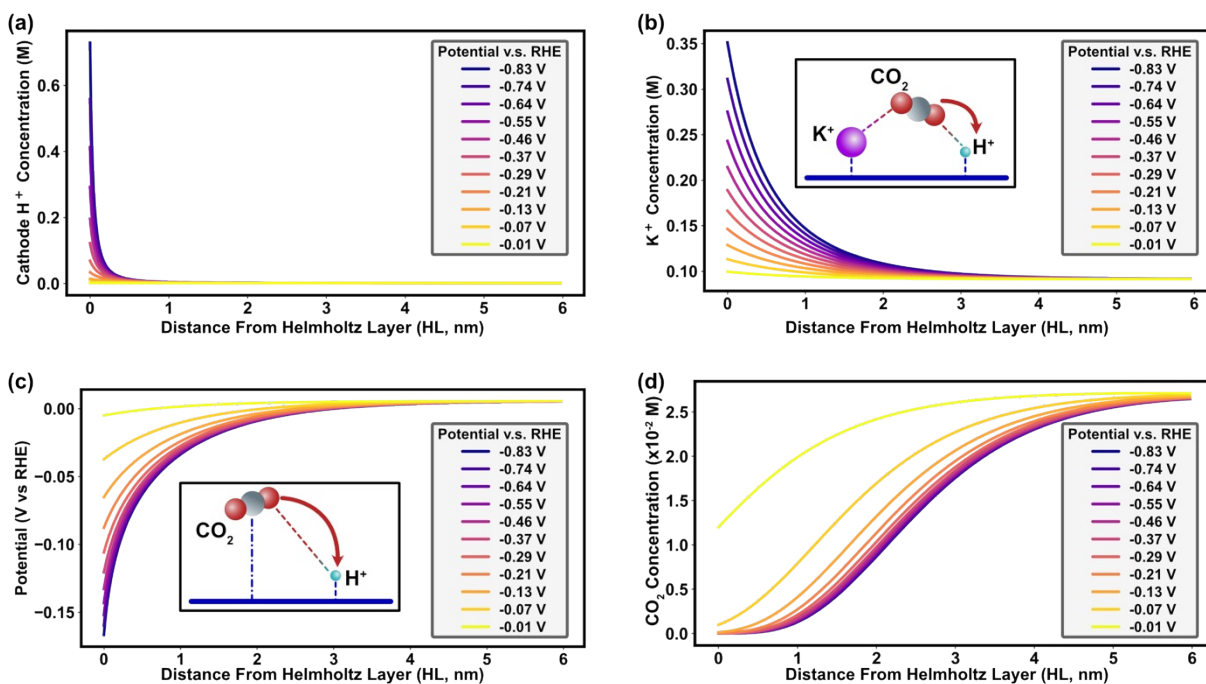

228

229 **Figure S2.** (a) Cathodic potential drop outside the Helmholtz layer; (b) Cathodic K<sup>+</sup> concentration

230 outside the Helmholtz layer; (c) Cathodic H<sup>+</sup> concentration outside the Helmholtz layer ; and (d)

231 Cathodic CO<sub>2</sub> concentration outside the Helmholtz layer.

232

233

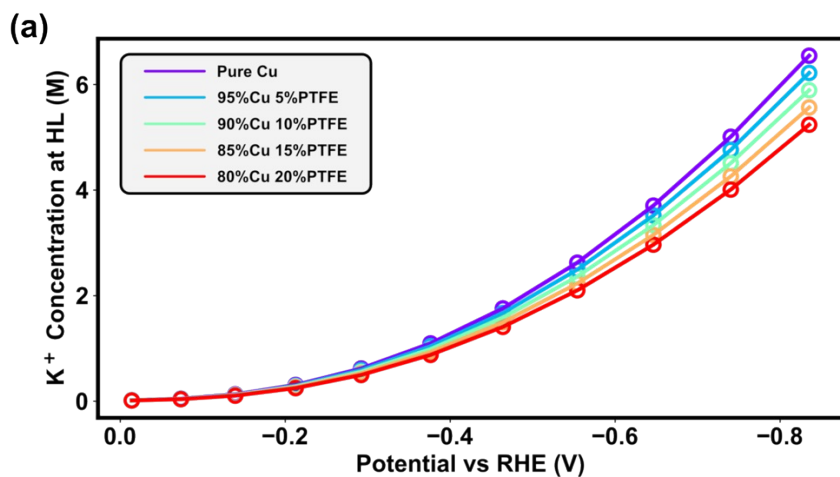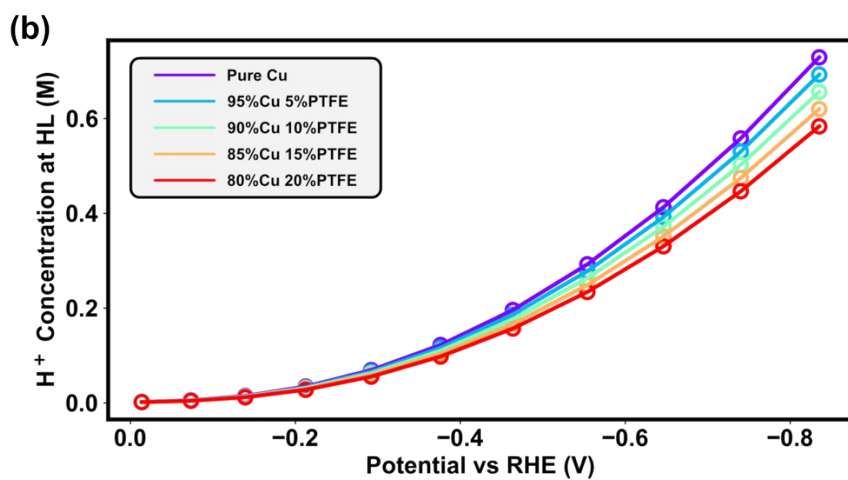

234

235

236 **Figure S3.** (a) Variation of K<sup>+</sup> concentration with potential on the Cu cathodes at different PTFE

237 ratios from 0% to 20%; (b) Variation of H<sup>+</sup> concentration with potential on the Cu cathodes at

238 different PTFE ratios from 0% to 20%.

239

240

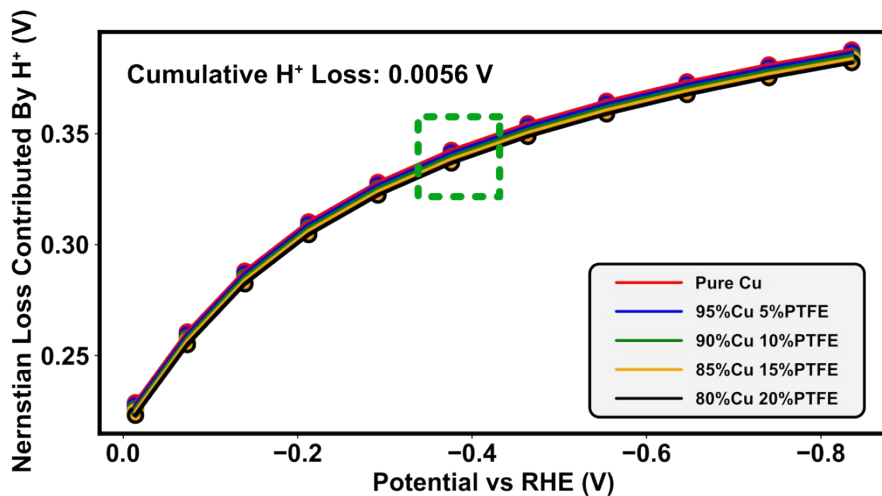

241

242 **Figure S4.** Variation of Nernstian loss contributed by H<sup>+</sup> with potential on the Cu cathodes at  
 243 different PTFE ratios from 0% to 20%.

244

245

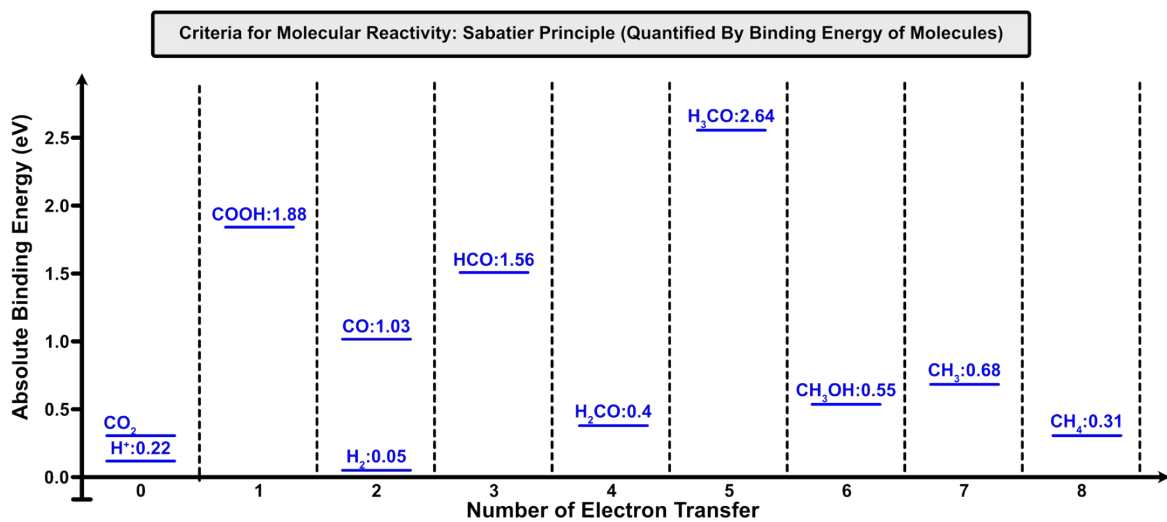

246

247 **Figure S5.** Binding energy of reagents, intermediates, and products in the reaction of  $\text{CO}_2\text{RR}$

248 and HER.



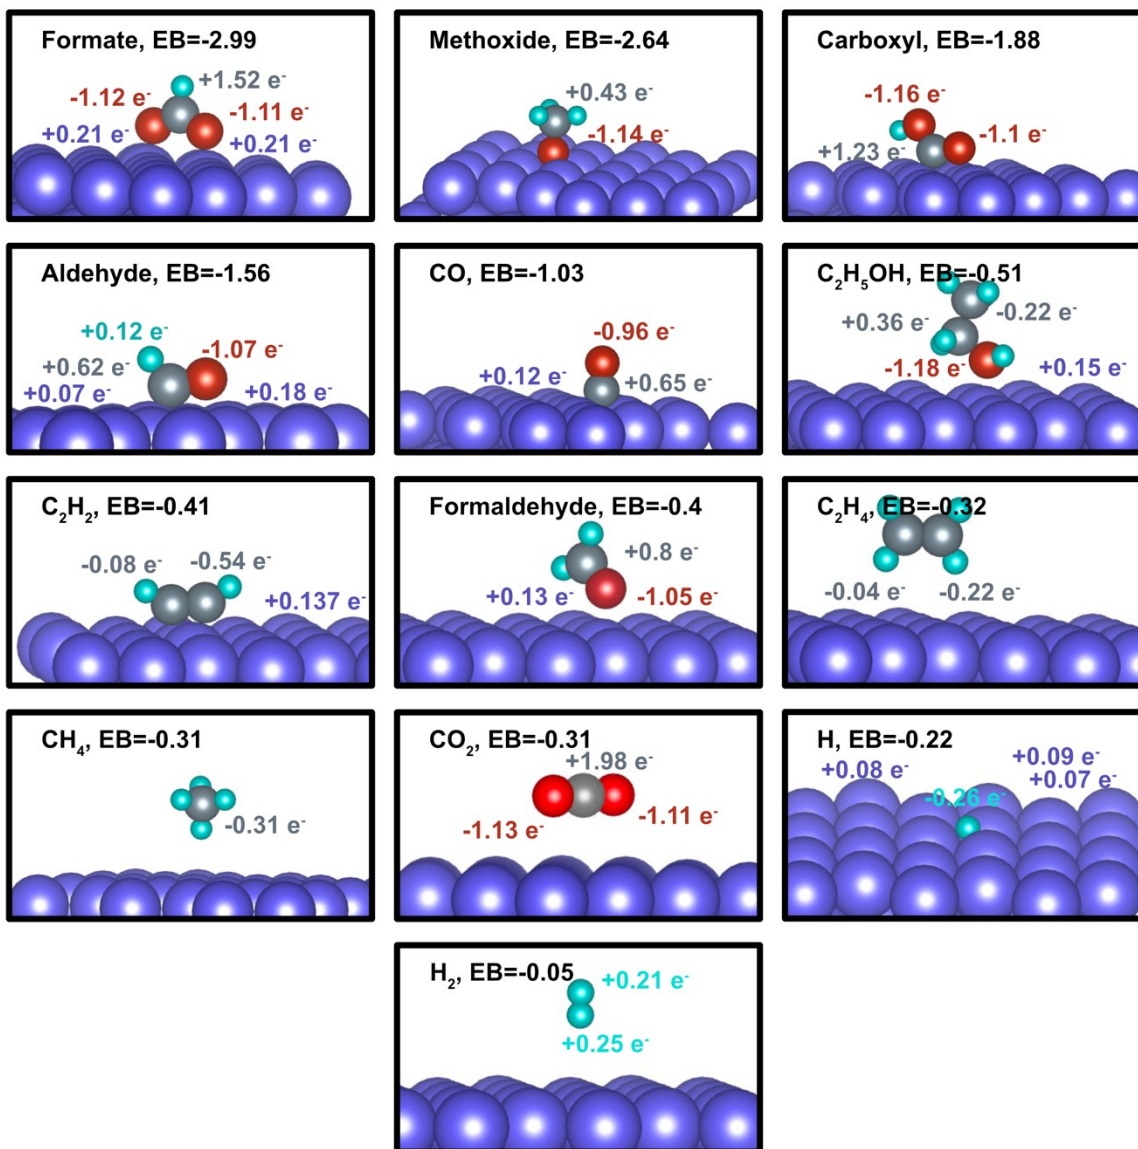

250

251 **Figure S6.** Bonding energy and bonding distances of major  $CO_2RR$  reactants, intermediates, and

252 products. Units of EB is eV in these figures. The EB values of the mentioned species are in

253 agreement with previously reported studies<sup>32</sup>.

254

255

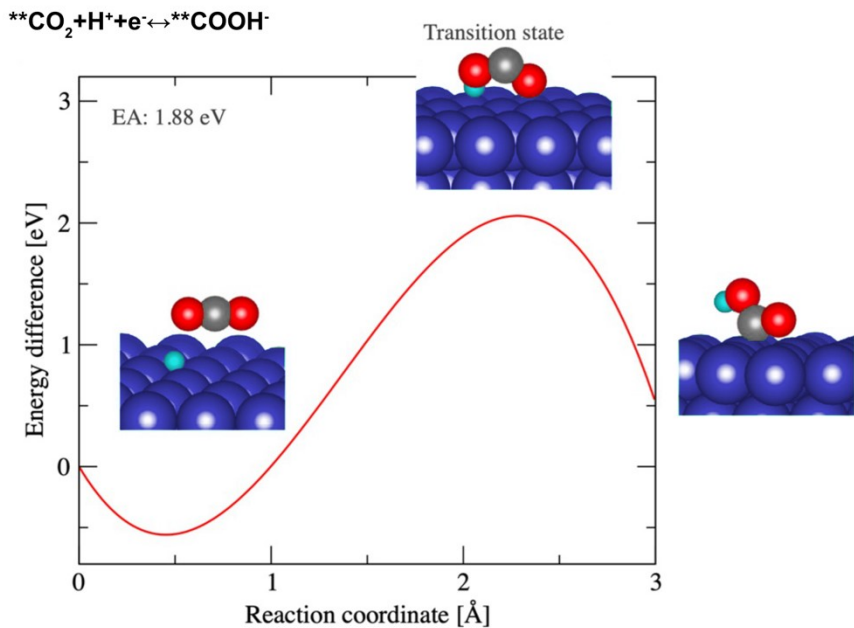

256

257 **Figure S7.** Barrier energy of CO<sub>2</sub> activation. This diagram shows the configuration of transition  
 258 states of activated CO<sub>2</sub> after the first proton-electron pair. It demonstrates the stable configuration  
 259 of the CO<sub>2</sub>-Cu(111) characterized by the parallel adsorption of CO<sub>2</sub> onto the Cu surface. The  
 260 adsorption energy is found to be -0.31 eV indicating the physisorption nature of the CO<sub>2</sub> onto the  
 261 Cu surface in the beginning.

262

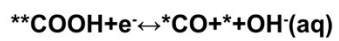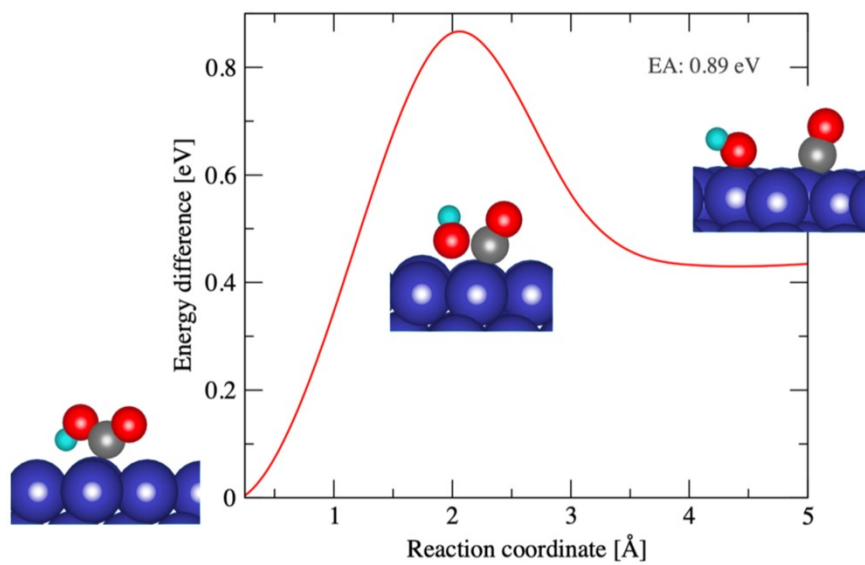

263

264 **Figure S8.** Barrier energy of CO generation. This diagram shows the process of dissociation of

265 the HO-CO bond.

266

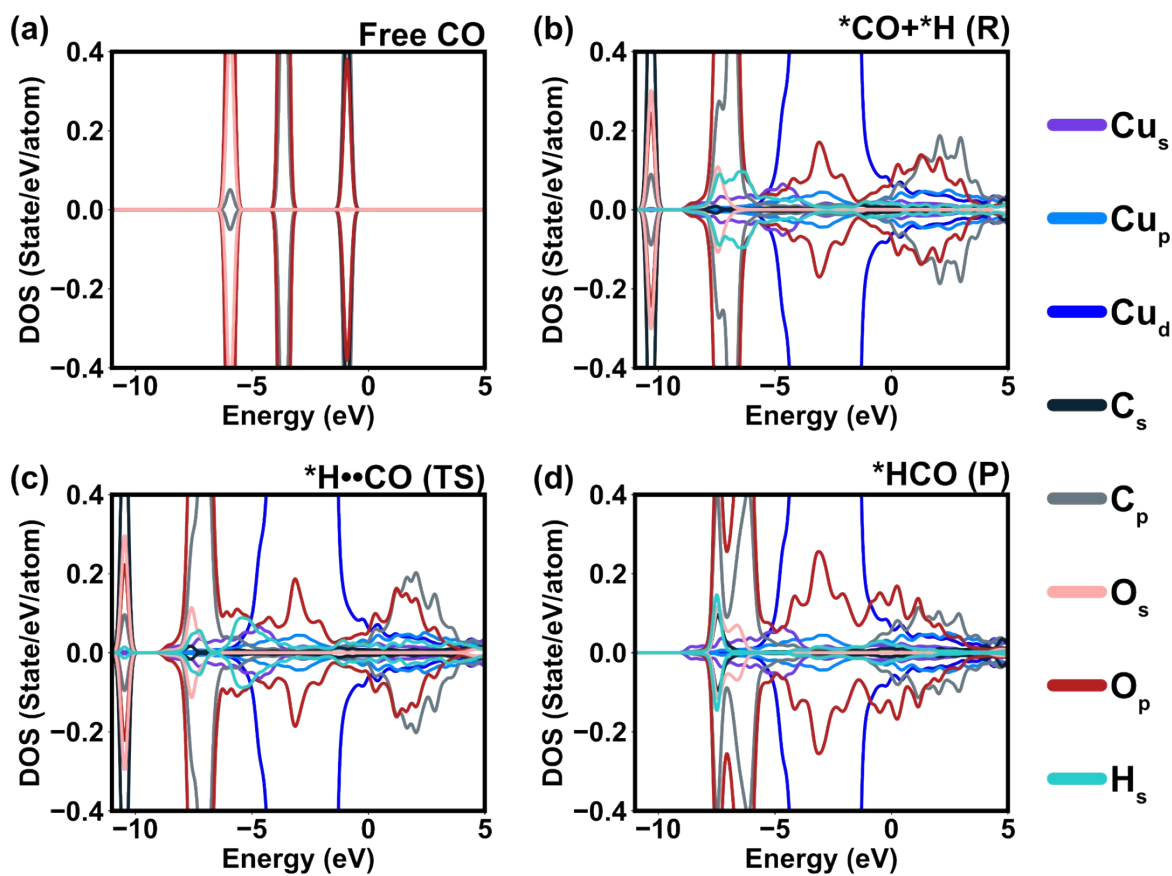

267

268 **Figure S9.** During CO protonation, the Density of state (DOS) results of (a) free CO, (b) \*CO

269 and \*H as reactants, (c) transition state of \*CO ·· \*H, and (d) final product of \*HCO.

270

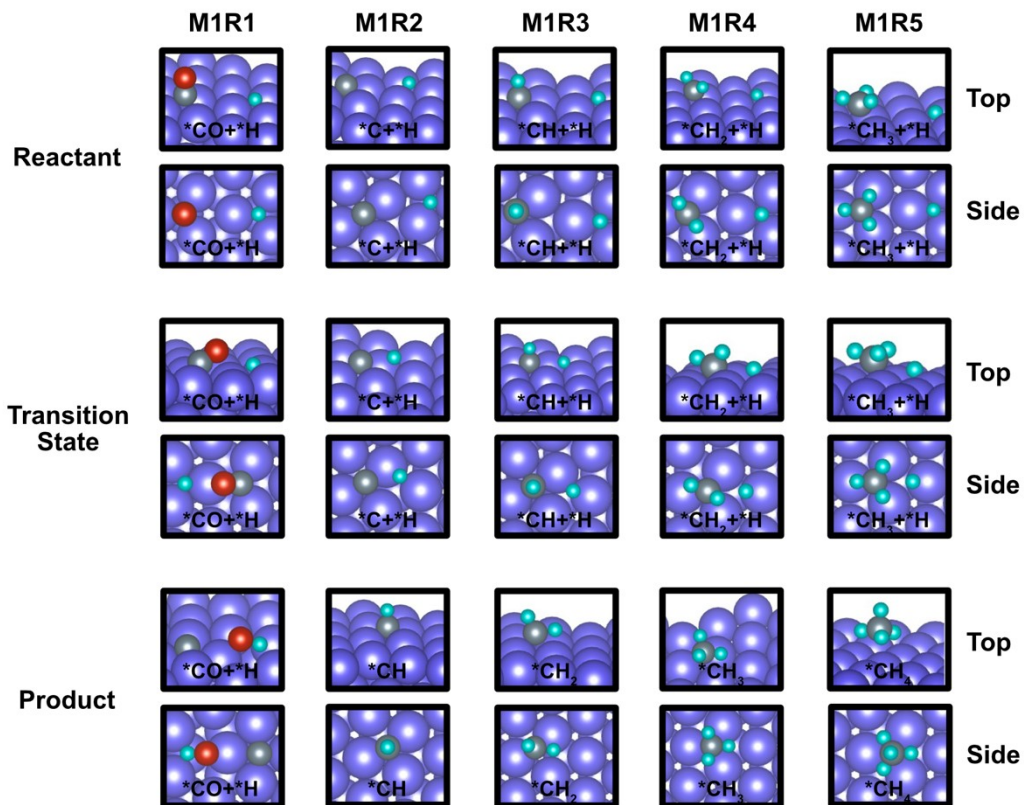

271

272 **Figure S10.** Configurations of reactants, transition states and products in Mechanism I. M1R1

273 represents “Mechanism I, reaction step 1”, with the same for all others.

274

275

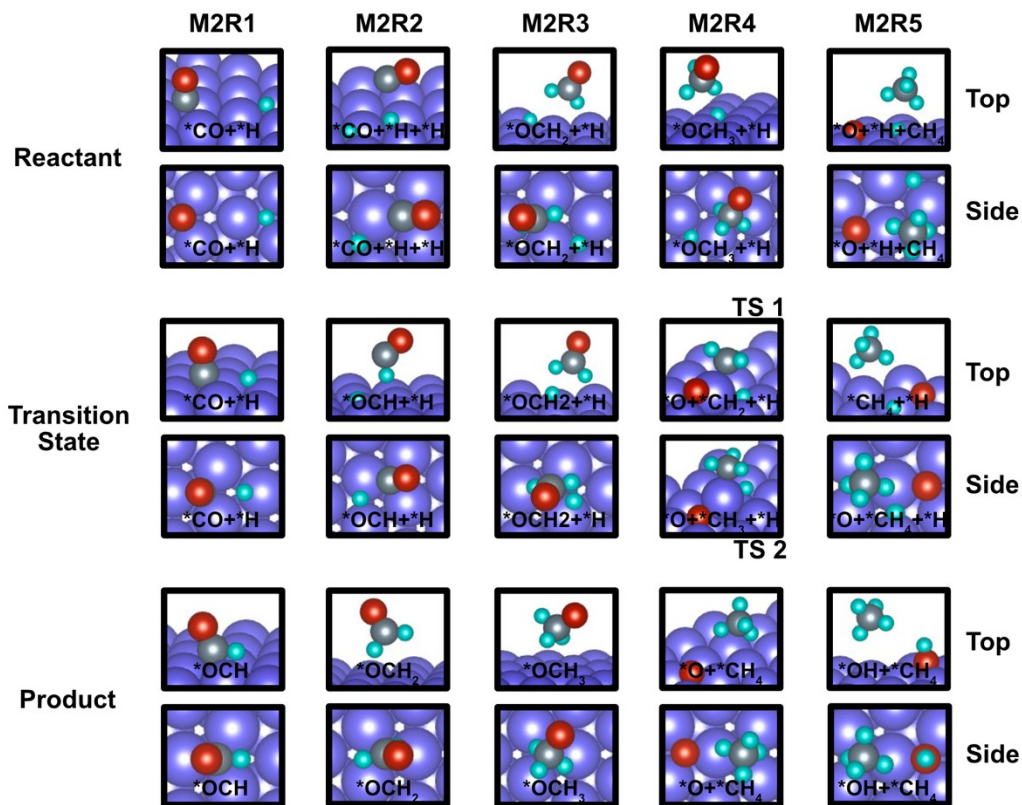

276

277 **Figure S11.** Configurations of reactants, transition states and products in Mechanism II. M2R1

278 represents “Mechanism II, reaction step 1”, with the same for all others.

279

280

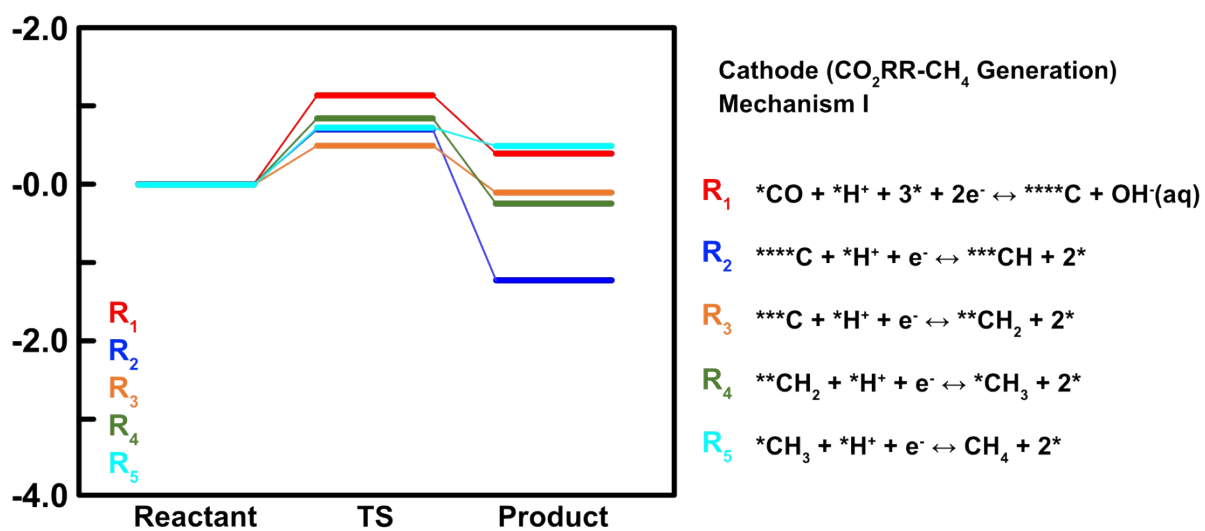

281

282 **Figure S12.** Reaction pathways for the CO<sub>2</sub>RR indicating the barrier energies of CO protonation

283 for CH<sub>4</sub> formation under Mechanism I. The color codes represent the reaction series happening

284 towards the CH<sub>4</sub> formation.

285

286

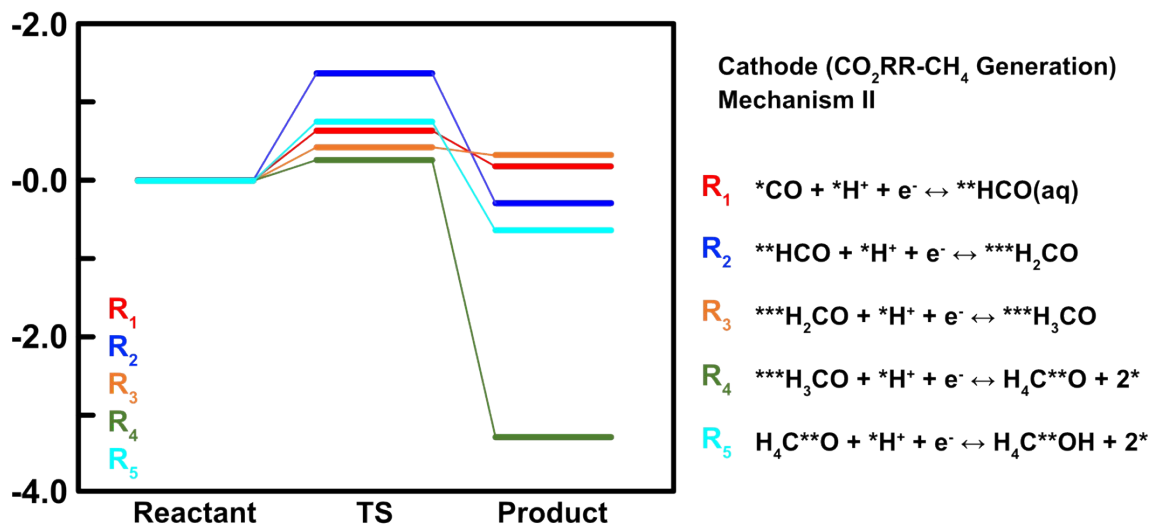

287

288 **Figure S13.** Reaction pathways for the CO<sub>2</sub>RR indicating the barrier energies of CO protonation  
 289 for CH<sub>4</sub> formation under Mechanism 2. The color codes represent the chain of reactions happening  
 290 towards the CH<sub>4</sub> formation.

291

292



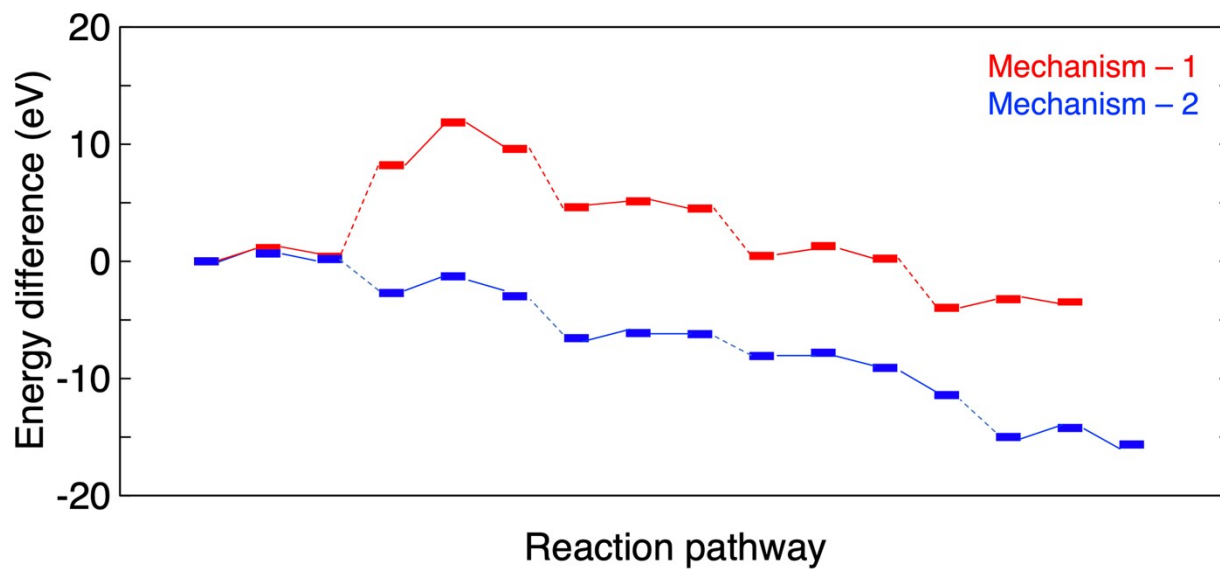

293

294 **Figure S14.** Complete energy profile comparison of CO<sub>2</sub>RR towards CH<sub>4</sub> generation through  
 295 Mechanisms I and II.

296

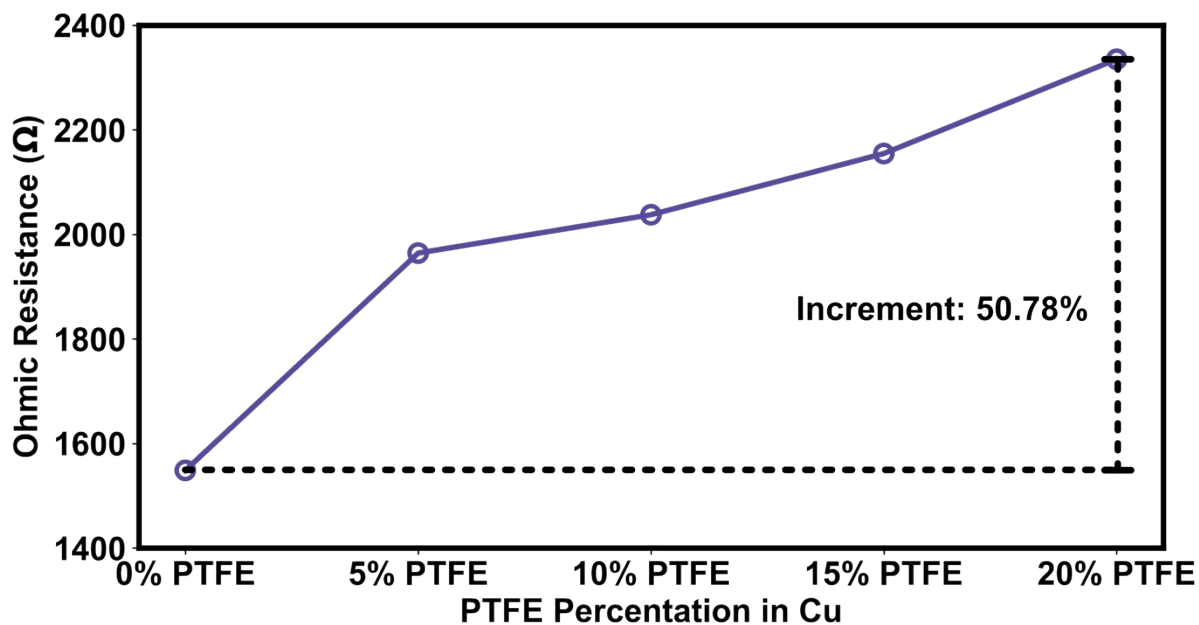

297

298 **Figure S15.** Ohmic resistance of the pristine Cu cathode and PTFE-Cu cathode at different PTFE  
299 ratios from 0% to 20%.

300

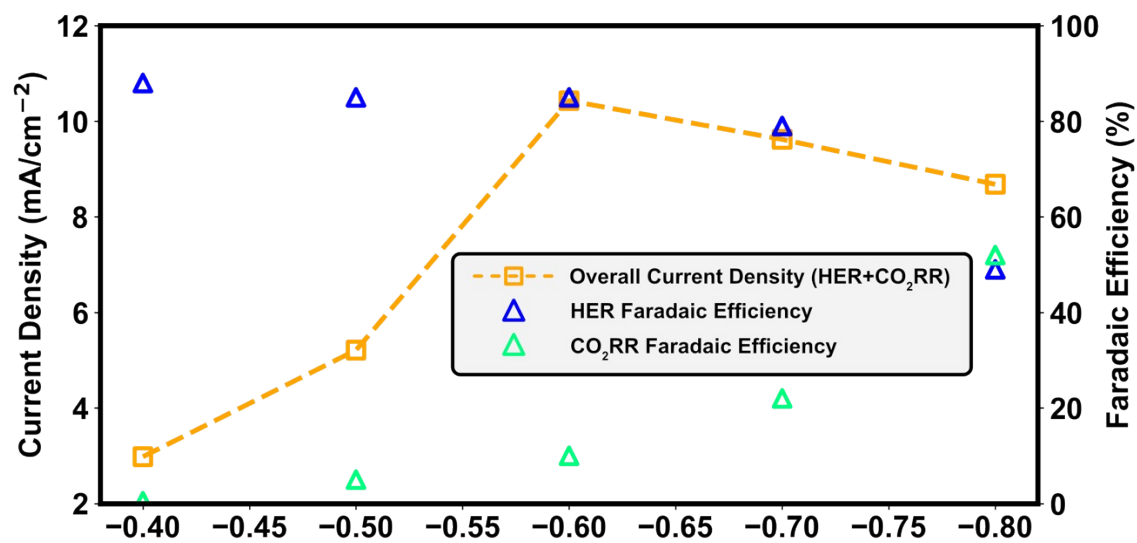

301  
 302 **Figure S16.** Current density of overall system including HER and CO<sub>2</sub>RR, and the Faradaic  
 303 efficiency (FE) of HER and CO<sub>2</sub>RR, separately.

304

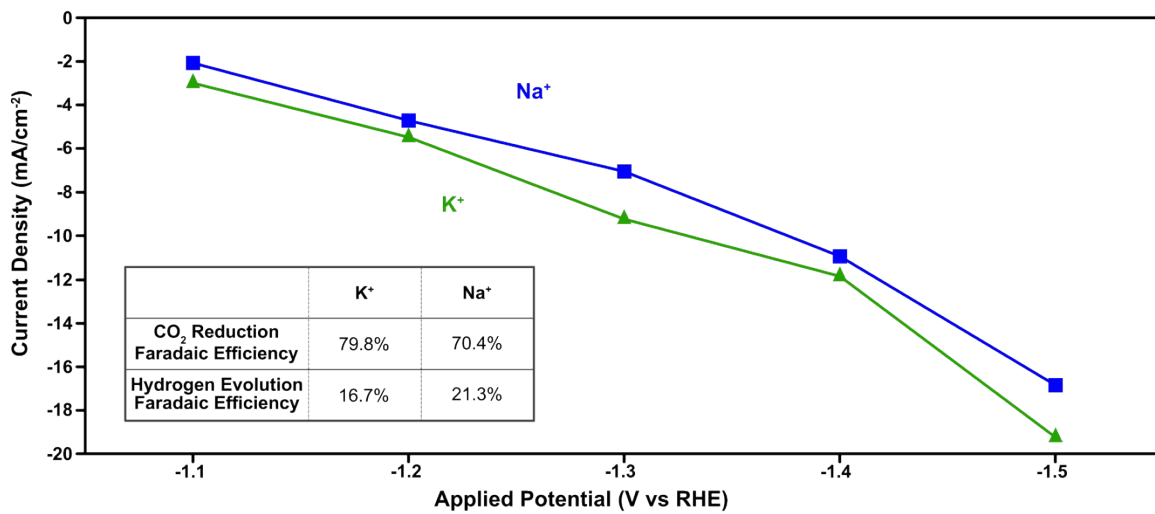

306

307 **Figure S17.** Difference of Faradaic efficiency (FE) and current density of the CO<sub>2</sub>RR system with  
 308 0.1 M KHCO<sub>3</sub> (green line) and 0.1M NaHCO<sub>3</sub> (blue line).

309

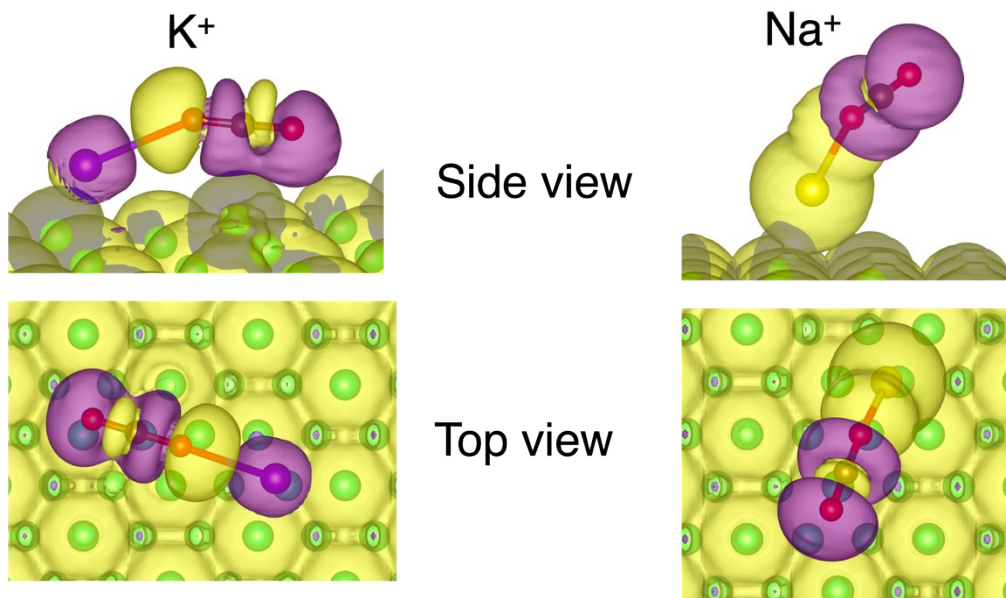

310

311 **Figure S18.** Side view and top view diagrams of electron cloud of  $\text{K}^+\text{-CO}_2$  and  $\text{Na}^+\text{-CO}_2$ .

312

313

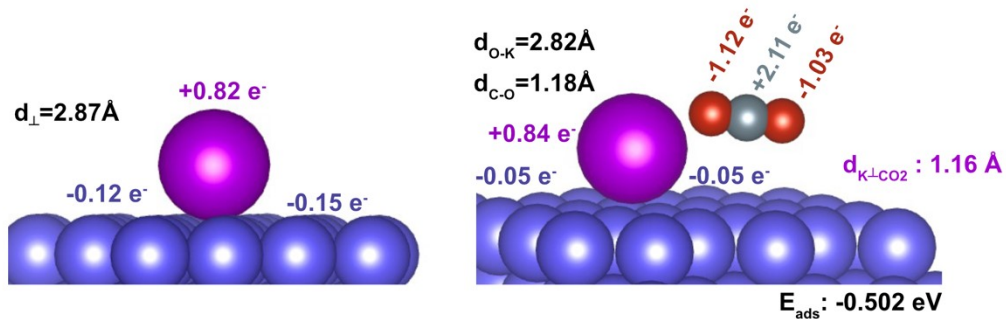

- Nearly parallel orientation of CO<sub>2</sub> on K-Cu(111) is highly preferred.
- CO<sub>2</sub> is located near potassium atom.
- Irregular stretching of C-O bond distances compared to that of the free CO<sub>2</sub> (dCO=1.16 Å).
- Presence of potassium ion enhances the BE of CO<sub>2</sub>.

314

315 **Figure S19.** Configurations of K<sup>+</sup> on the Cu catalyst and its stabilization effect with absorbed

316 CO<sub>2</sub> molecules.

317

318

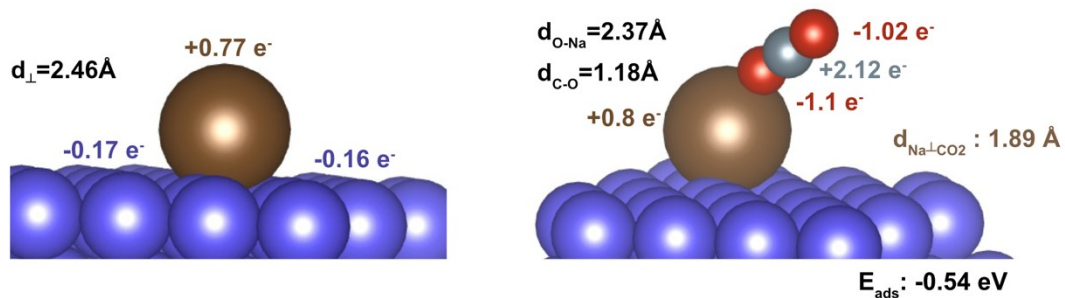

- Tilted orientation of  $\text{CO}_2$  on Na-Cu(111) is highly preferred.
- $\text{CO}_2$  adsorption onto the Na site takes place.
- Irregular stretching of C-O bond distances compared to that of the free  $\text{CO}_2$  ( $d_{\text{CO}} = 1.16 \text{ \AA}$ ).
- Presence of sodium leads to enhanced binding of  $\text{CO}_2$ .

319

320 **Figure S20.** Configurations of  $\text{Na}^+$  on the Cu catalyst and its stabilization effect with absorbed

321  $\text{CO}_2$  molecules.

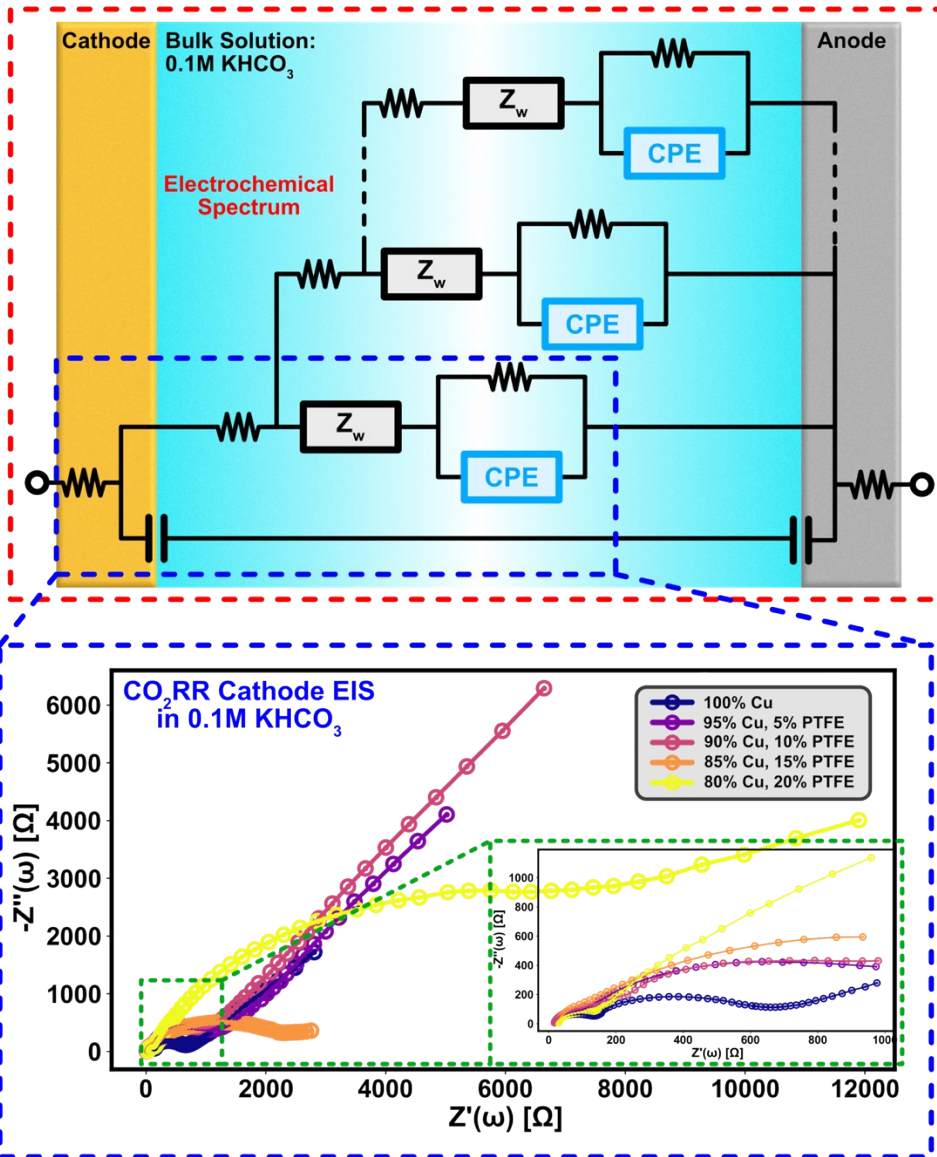

322

323

324 **Figure S21.** Simplified equivalent circuit of the CO<sub>2</sub>RR system and the electrochemical

325 impedance spectroscopy (EIS) experimental results of the pristine Cu and PTFE-Cu cathodes at

326 different PTFE ratios from 0% to 20%.

327

328



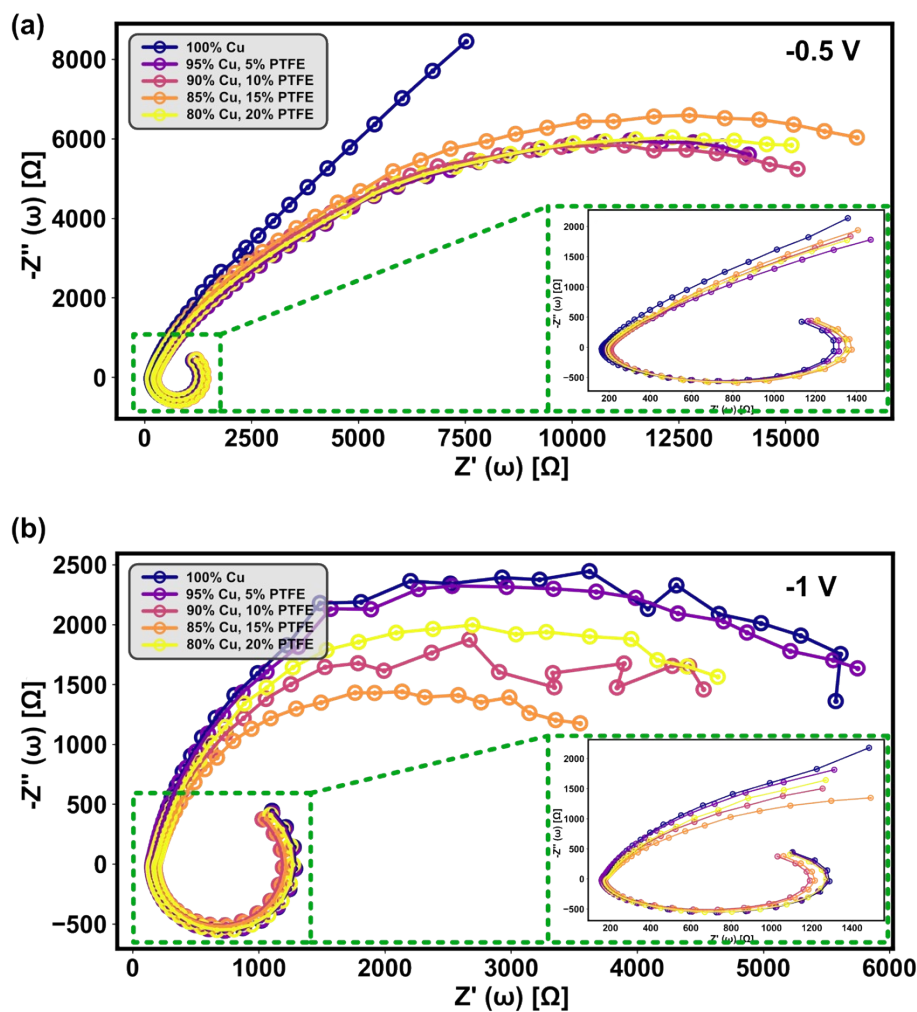

330

331 **Figure S22.** (a) EIS experimental results of H<sup>+</sup> diffusion across proton exchange membrane  
 332 (PEM) towards the pristine Cu and PTFE-Cu cathodes with the PTFE ratios from 5% to 20%  
 333 under -0.5V; (b) EIS experimental results of H<sup>+</sup> diffusion across PEM towards the pristine Cu

334 and PTFE-Cu cathodes with the PTFE ratios from 5% to 20% under -1V.

335

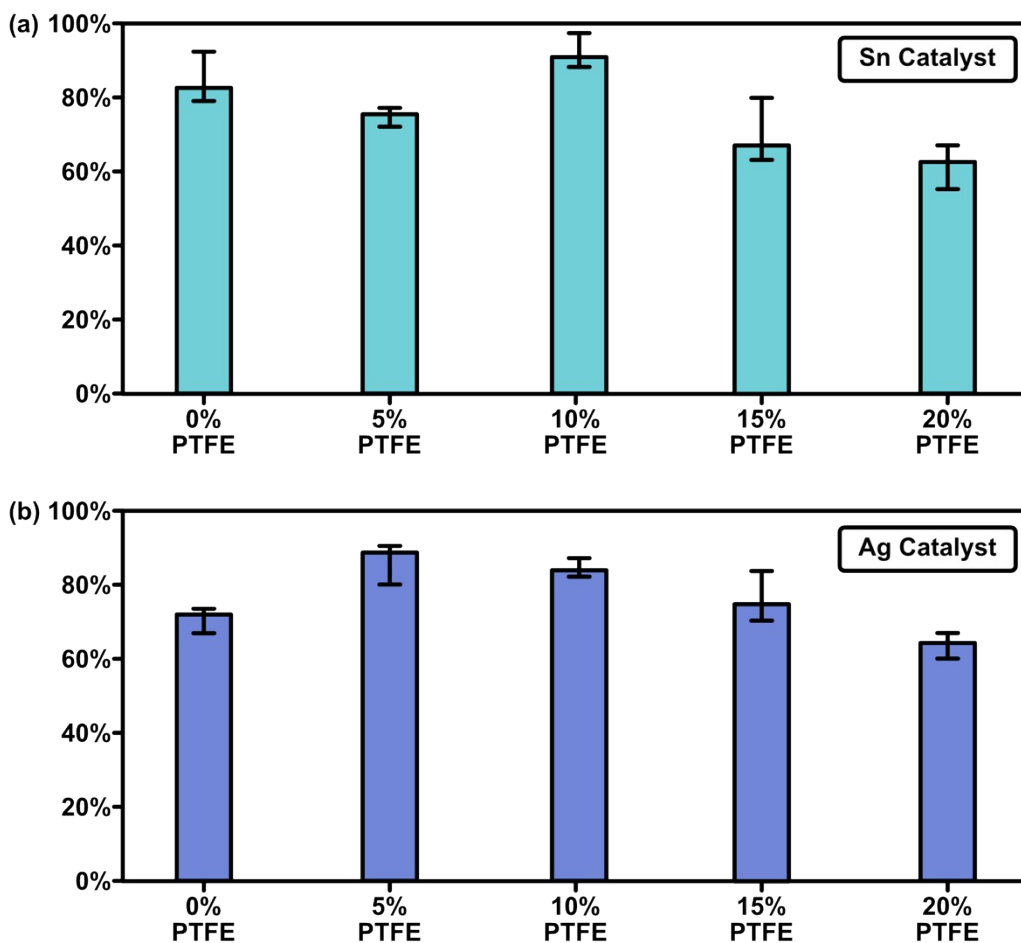

336

337 **Figure S23.** (a) The Faradaic efficiency (FE) of Sn catalyst with the PTFE ratios of 0%, 5%,  
338 10%, 15%, and 20%; and (b) Faradaic efficiency (FE) of Ag catalyst with the PTFE ratios of 0%,  
339 5%, 10%, 15%, and 20% under the external potential of -2.1V vs Ag/AgCl.

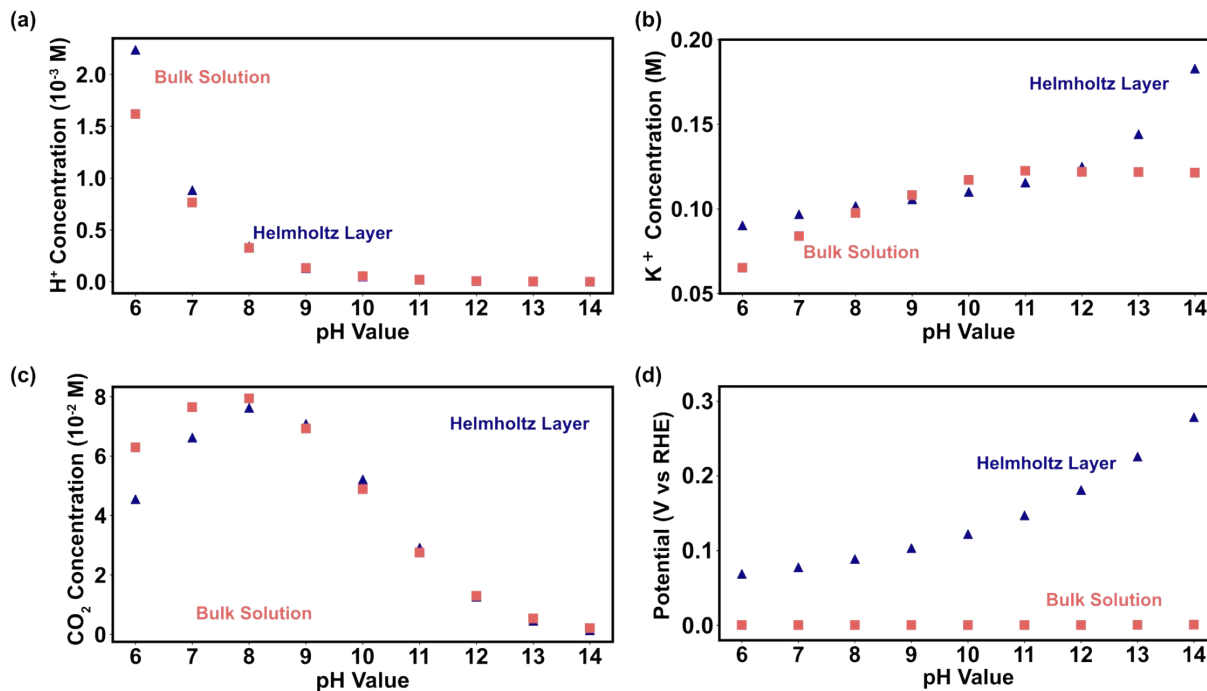

340

341 **Figure S24.** Variation of  $H^+$ ,  $K^+$ ,  $CO_2$ , and electrical potential in the Helmholtz layer and bulk  
 342 solution under pH from 6 to 14. (a) Cathodic  $H^+$  concentration in Helmholtz layer and bulk  
 343 solution; (b) Cathodic  $K^+$  concentration in Helmholtz layer and bulk solution; (c) Cathodic  $CO_2$   
 344 concentration in Helmholtz layer and bulk solution; (d) Cathodic potential drop in Helmholtz layer  
 345 and bulk solution.

346

347

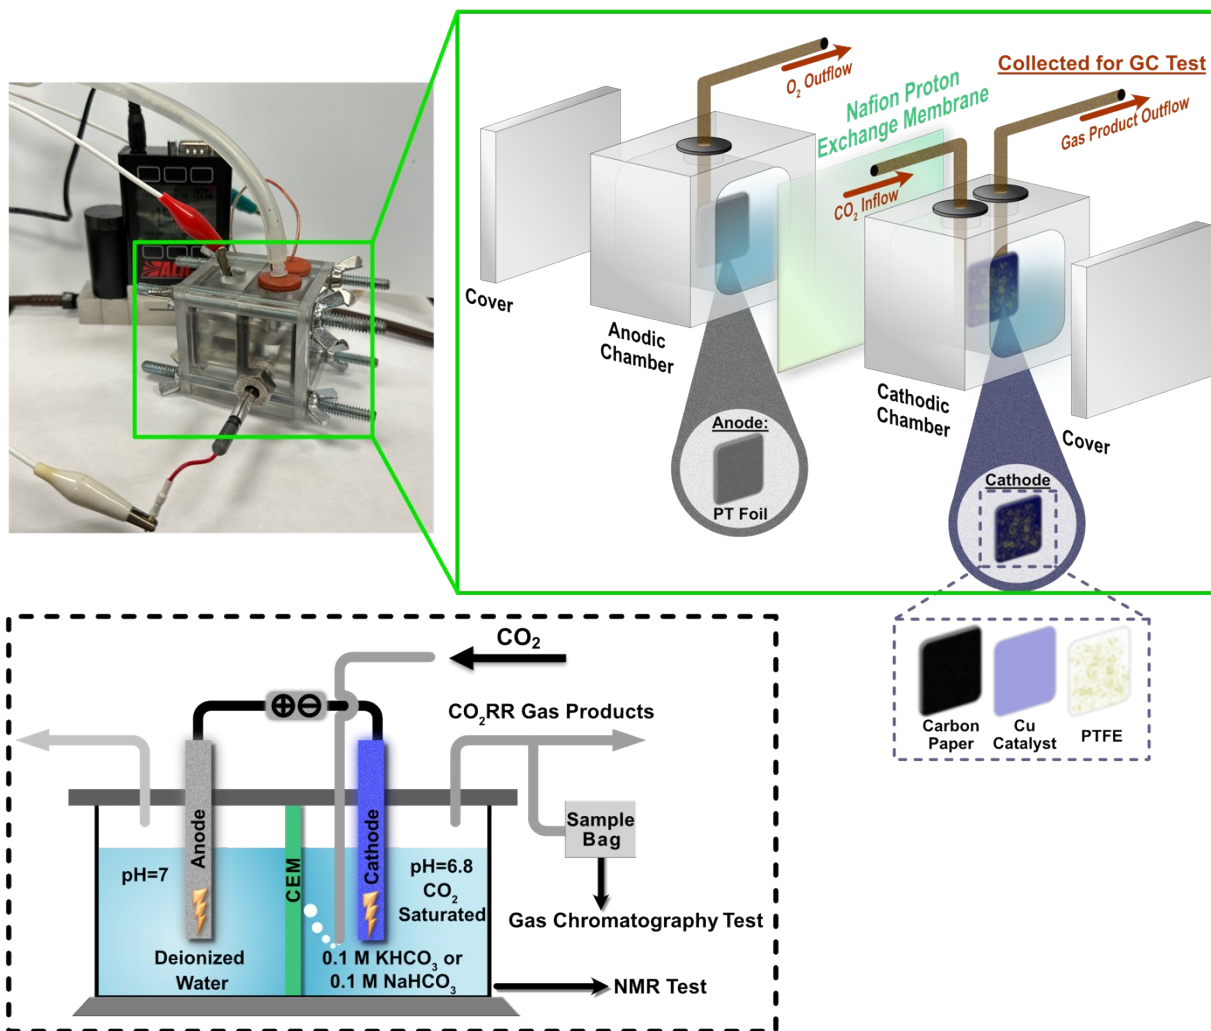

348

349 **Figure S25:** Diagram of the system setup for the CO<sub>2</sub>RR experiments.

350

351

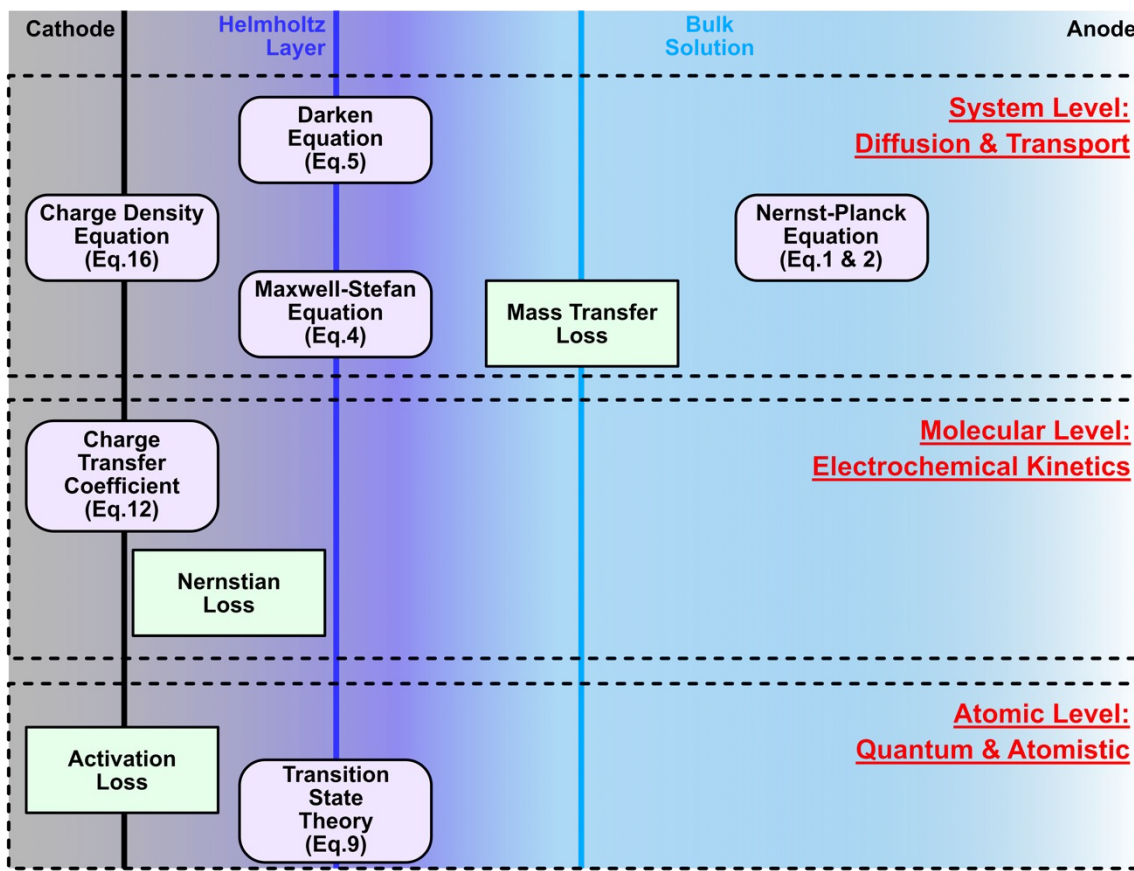

352

353

354 **Figure S26.** Governing equations at each layer of the multiscale model. The dash line box  
 355 categorizes the equations according to the three levels of the multiscale model as is discussed in  
 356 the main context. The vertical lines in different colors define the spatial location that each equation  
 357 is applied in the CO<sub>2</sub>RR system.

358

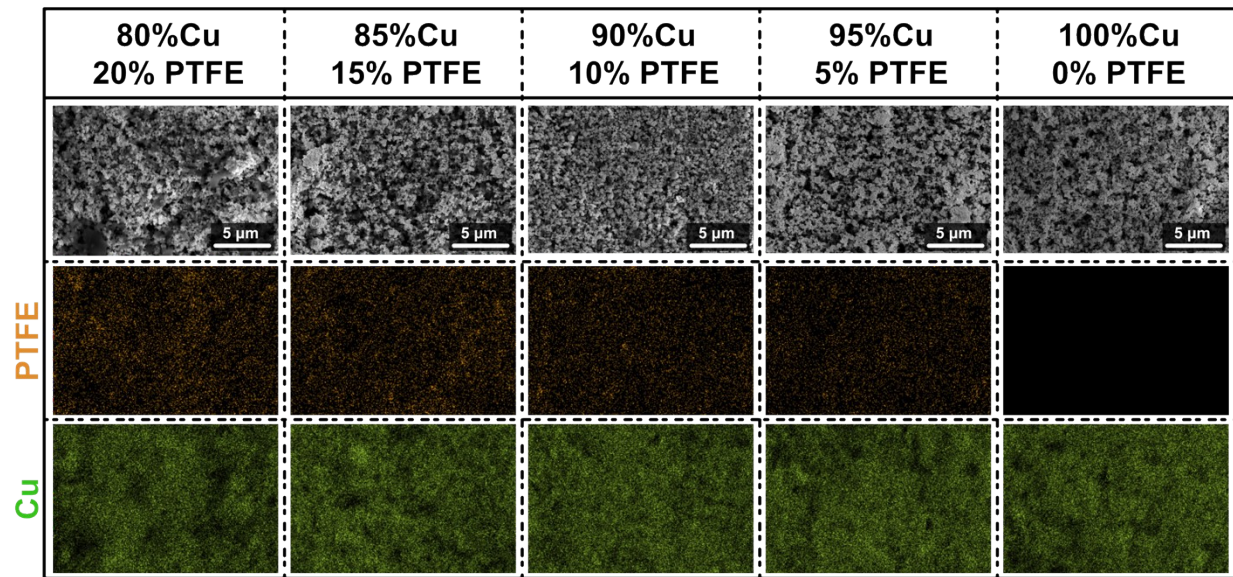

359

360 **Figure S27.** The corresponding SEM images of EDAX mappings in Figure 2b.

361

362 **Table S1.** Percentage of Cu and PTFE in the cathodes for experiment, as well as the original SEM  
363 and EDAX mapping for each Cu-PTFE ratio

|                    | <i>Theoretical<br/>80%Cu</i> | <i>Theoretical<br/>85%Cu</i> | <i>Theoretical<br/>90%Cu</i> | <i>Theoretical<br/>95%Cu</i> | <i>Theoretical<br/>100%Cu</i> |
|--------------------|------------------------------|------------------------------|------------------------------|------------------------------|-------------------------------|
| <b><i>Cu</i></b>   | 81.86%                       | 84.76%                       | 89.55%                       | 91.89%                       | 100%                          |
| <b><i>PTFE</i></b> | 18.14%                       | 15.24%                       | 10.45%                       | 8.11%                        | 0%                            |

364

365

366 **Table S2.** Barrier energy and free energies of CO generation.

|           | <i>Barrier Energy (eV)</i> | <i>Free Energy (eV)</i> |
|-----------|----------------------------|-------------------------|
| <i>R1</i> | 1.89                       | 0.52                    |
| <i>R2</i> | 0.87                       | 0.44                    |

367

368

369



370 **Table S3.** Barrier energies and free energies of CH<sub>4</sub> generation in Mechanism I.

|             | <i>Barrier Energy (eV)</i> | <i>Free Energy (eV)</i> |
|-------------|----------------------------|-------------------------|
| <i>MIR1</i> | 1.14                       | 0.4                     |
| <i>MIR2</i> | 0.75                       | -1.24                   |
| <i>MIR3</i> | 0.5                        | -0.12                   |
| <i>MIR4</i> | 0.83                       | -0.23                   |
| <i>MIR5</i> | 0.73                       | 0.5                     |

371

372

373

374 **Table S4.** Barrier energies and free energies of CH<sub>4</sub> generation in Mechanism II.

|             | <i>Barrier Energy (eV)</i> | <i>Free Energy (eV)</i> |
|-------------|----------------------------|-------------------------|
| <i>M1S1</i> | 0.68                       | 1.2                     |
| <i>M2S2</i> | 1.42                       | 0.17                    |
| <i>M2S3</i> | 0.44                       | 0.35                    |
| <i>M2S4</i> | 0.28                       | -3.33                   |
| <i>M2S5</i> | 0.77                       | 0.64                    |

375

376

377

378

379 **Table S5.** Bond length and distance of molecules between molecule and Cu atom (Unit: Å).

|                                     | $d_{C-O}$ | $d_{C-H}$ | $d_{\perp Cu}$ | $d_{O-H}$ | $d_{C-C}$ | $d_{H-H}$ |
|-------------------------------------|-----------|-----------|----------------|-----------|-----------|-----------|
| <b>HCOO</b>                         | 1.27      | 1.11      | 1.99           | /         | /         | /         |
| <b>CH<sub>3</sub>O</b>              | 1.44      | 1.1       | 1.37           | /         | /         | /         |
| <b>COOH</b>                         | 1.3       | /         | 2              | 0.98      | /         | /         |
| <b>CHO</b>                          | 1.25      | 1.12      | 1.9            | /         | /         | /         |
| <b>CO</b>                           | 1.17      | /         | 1.57           | /         | /         | /         |
| <b>C<sub>2</sub>H<sub>5</sub>OH</b> | 1.45      | 1.1       | 2.27           | 0.97      | 1.52      | /         |
| <b>C<sub>2</sub>H<sub>2</sub></b>   | /         | 1.08      | 2.04           | /         | 1.27      | /         |
| <b>CH<sub>2</sub>O</b>              | 1.22      | 1.11      | 2.37           | /         | /         | /         |
| <b>C<sub>2</sub>H<sub>4</sub></b>   | /         | 1.09      | 3.24           | /         | 1.33      | /         |
| <b>CH<sub>4</sub></b>               | /         | 1.09      | 3.12           | /         | /         | /         |
| <b>CO<sub>2</sub></b>               | 1.18      | /         | 3.51           | /         | /         | /         |
| <b>H</b>                            | /         | /         | 0.98 (Note)    | /         | /         | /         |
| <b>H<sub>2</sub></b>                | /         | /         | 3.46           | /         | /         | 0.75      |

380

381 **Note:** The chemisorption bond length of Cu-H is 1.74 Å.

382

383 **Table S6.** T-tests of Faradaic efficiency (FE) results obtained for CH<sub>4</sub> and CO .

384 a. CH<sub>4</sub> FE t-statistics table:

|            | <i>0%</i> | <i>5%</i> | <i>10%</i> | <i>15%</i> | <i>20%</i> |
|------------|-----------|-----------|------------|------------|------------|
| <i>0%</i>  | 0         | -0.113    | -0.409     | -0.073     | -0.143     |
| <i>5%</i>  | -0.113    | 0         | -0.294     | 0.04       | -0.025     |
| <i>10%</i> | -0.409    | -0.294    | 0          | 0.333      | 0.28       |
| <i>15%</i> | -0.073    | 0.04      | 0.333      | 0          | -0.066     |
| <i>20%</i> | -0.143    | -0.025    | 0.28       | -0.066     | 0          |

385

386 b. CO FE t- statistics table:

|            | <i>0%</i> | <i>5%</i> | <i>10%</i> | <i>15%</i> | <i>20%</i> |
|------------|-----------|-----------|------------|------------|------------|
| <i>0%</i>  | 0         | -0.704    | 0.097      | 0.276      | 1.246      |
| <i>5%</i>  | -0.704    | 0         | 0.666      | 0.776      | 1.541      |
| <i>10%</i> | 0.097     | 0.666     | 0          | 0.158      | 0.934      |
| <i>15%</i> | 0.276     | 0.776     | 0.158      | 0          | 0.711      |
| <i>20%</i> | 1.246     | 1.541     | 0.934      | 0.711      | 0          |

387

388 **Table S7.** Boundary condition of Nernst-Planck equation and Poisson equation.

|                                           | $c_{0,init}$ ( <i>Variable</i> )<br>(mol/m <sup>3</sup> ) | $c_{\infty,Bulk}$<br>( <i>Constant</i> )<br>(mol/m <sup>3</sup> ) |
|-------------------------------------------|-----------------------------------------------------------|-------------------------------------------------------------------|
| <b><i>CO</i><sub>2</sub></b>              | 0                                                         | $1.55 \times 10^{-5}$                                             |
| <b><i>H</i><sup>+</sup></b>               | 1.1138                                                    | 1.1138                                                            |
| <b><i>OH</i><sup>-</sup></b>              | 0.74659                                                   | 0.74659                                                           |
| <b><i>K</i><sup>+</sup></b>               | 100                                                       | 100                                                               |
| <b><i>HCO</i><sub>3</sub><sup>-</sup></b> | 59.943                                                    | 59.943                                                            |
| <b><i>CO</i><sub>3</sub><sup>2-</sup></b> | 1.7584                                                    | 1.7584                                                            |

389

391 **Table S8.** Diffusion coefficients of molecules<sup>33</sup>.

|                                    | <i>Diffusion Coefficient</i><br><i>(10<sup>-9</sup> m<sup>2</sup>/s)</i> |
|------------------------------------|--------------------------------------------------------------------------|
| <i>CO<sub>2</sub></i>              | 1.6                                                                      |
| <i>H<sup>+</sup></i>               | 9.31                                                                     |
| <i>OH<sup>-</sup></i>              | 5.27                                                                     |
| <i>K<sup>+</sup></i>               | 1.96                                                                     |
| <i>Na<sup>+</sup></i>              | 1.33                                                                     |
| <i>HCO<sub>3</sub><sup>-</sup></i> | 1.18                                                                     |
| <i>CO<sub>3</sub><sup>2-</sup></i> | 0.955                                                                    |

392

393

394 **Reference:**

395 1 Q. Zheng and G.-W. Wei, *J. Chem. Phys.*, 2011, **134**, 194101.

396 2 S. Hassani, in *Mathematical Methods: For Students of Physics and Related Fields*, ed. S.

397 Hassani, Springer, New York, NY, 2009, pp. 139–170.

398 3 D. Bohra, J. H. Chaudhry, T. Burdyny, E. A. Pidko and W. A. Smith, *Energy Environ. Sci.*,

399 2019, **12**, 3380–3389.

400 4 T. Allie-Ebrahim, Q. Zhu, P. Bräuer, G. D. Moggridge and C. D'Agostino, *Phys. Chem. Chem.*

401 *Phys.*, 2017, **19**, 16071–16077.

402 5 X. Liu, T. J. H. Vlugt and A. Bardow, *Ind. Eng. Chem. Res.*, 2011, **50**, 10350–10358.

403 6 B. Eren, R. S. Weatherup, N. Liakakos, G. A. Somorjai and M. Salmeron, *J. Am. Chem. Soc.*,

404 2016, **138**, 8207–8211.

405 7 Y.-H. Fang and Z.-P. Liu, *ACS Catal.*, 2014, **4**, 4364–4376.

406 8 V. I. Birss and A. Damjanovic, *J. Electrochem. Soc.*, 1983, **130**, 1694.

407 9 A. H. Motagamwala and J. A. Dumesic, *Chem. Rev.*, 2021, **121**, 1049–1076.

408 10M. E. Björketun, V. Tripkovic, E. Skúlason and J. Rossmeisl, *Catal. Today*, 2013, **202**, 168–

409 174.

410 11N. D. Lang and W. Kohn, *Phys. Rev. B*, 1970, **1**, 4555–4568.

411 12K. Besteman, M. A. G. Zevenbergen and S. G. Lemay, *Phys. Rev. E*, 2005, **72**, 061501.

412 13B. E. Logan, E. Zikmund, W. Yang, R. Rossi, K.-Y. Kim, P. E. Saikaly and F. Zhang, *Environ.*

413 *Sci. Technol.*, 2018, **52**, 8977–8985.

414 14M. Arif, S. C. P. Cheung and J. Andrews, *Energy Fuels*, 2020, **34**, 13010–13022.

415 15D. Yu and S. Yuvarajan, in *Nineteenth Annual IEEE Applied Power Electronics Conference*

416 *and Exposition, 2004. APEC '04.*, 2004, vol. 1, pp. 362-366 Vol.1.

417 16A. K. Sharma, K. Ahmed and E. Birgersson, *Ionics*, 2018, **24**, 2047–2054.

418 17J. P. Perdew, K. Burke and M. Ernzerhof, *Phys. Rev. Lett.*, 1996, **77**, 3865–3868.

419 18L. Vitos, A. V. Ruban, H. L. Skriver and J. Kollár, *Surf. Sci.*, 1998, **411**, 186–202.

420 19G. Kresse and J. Furthmüller, *Comput. Mater. Sci.*, 1996, **6**, 15–50.

421 20P. E. Blöchl, *Phys. Rev. B*, 1994, **50**, 17953–17979.

422 21G. Henkelman, A. Arnaldsson and H. Jónsson, *Comput. Mater. Sci.*, 2006, **36**, 354–360.

423 22J. K. Nørskov, J. Rossmeisl, A. Logadottir, L. Lindqvist, J. R. Kitchin, T. Bligaard and H.  
424 Jónsson, *J. Phys. Chem. B*, 2004, **108**, 17886–17892.

425 23J.-L. Liu and C.-L. Li, *AIP Adv.*, 2019, **9**, 015214.

426 24R. R. Netz, *Phys. Rev. E*, 1999, **60**, 3174–3182.

427 25M. Huš, D. Kopač, N. S. Štefančič, D. L. Jurković, V. D. B. C. Dasireddy and B. Likozar,  
428 *Catal. Sci. Technol.*, 2017, **7**, 5900–5913.

429 26A. Pavlišič, M. Huš, A. Prašnikar and B. Likozar, *J. Clean. Prod.*, 2020, **275**, 122958.

430 27A. Alhajaj and N. Shah, *Int. J. Greenh. Gas Control*, 2020, **94**, 102925.

431 28A. Alhajaj, N. M. Dowell and N. Shah, *Energy Procedia*, 2013, **37**, 2552–2561.

432 29M. I. Alam, R. Cheula, G. Moroni, L. Nardi and M. Maestri, *Catal. Sci. Technol.*, 2021, **11**,  
433 6601–6629.

434 30Q. Sun and Z. Liu, *Front. Chem. China*, 2011, **6**, 164.

435 31M. R. Singh, J. D. Goodpaster, A. Z. Weber, M. Head-Gordon and A. T. Bell, *Proc. Natl.*  
436 *Acad. Sci.*, 2017, **114**, E8812–E8821.

437 32L. Xu, J. Lin, Y. Bai and M. Mavrikakis, *Top. Catal.*, 2018, **61**, 736–750.

438 33 Table of Diffusion Coefficients, <https://www.aqion.de/site/diffusion-coefficients>, (accessed  
439 May 17, 2023).
